## CORRECTION

# Correction: The world's user-generated road map is more than 80% complete

Christopher Barrington-Leigh, Adam Millard-Ball

## Notice of republication

An incorrect version of Fig 1 was published in error. This article was republished on October 18, 2019 to correct for this error. Please download this article again to view the correct version.

## Reference

1. Barrington-Leigh C, Millard-Ball A (2017) The world's user-generated road map is more than 80% complete. PLoS ONE 12(8): e0180698. <https://doi.org/10.1371/journal.pone.0180698> PMID: [28797037](https://pubmed.ncbi.nlm.nih.gov/28797037/)

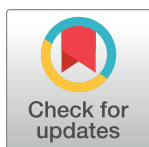

## OPEN ACCESS

**Citation:** Barrington-Leigh C, Millard-Ball A (2019) Correction: The world's user-generated road map is more than 80% complete. PLoS ONE 14(10): e0224742. <https://doi.org/10.1371/journal.pone.0224742>

**Published:** October 29, 2019

**Copyright:** © 2019 Barrington-Leigh, Millard-Ball. This is an open access article distributed under the terms of the [Creative Commons Attribution License](https://creativecommons.org/licenses/by/4.0/), which permits unrestricted use, distribution, and reproduction in any medium, provided the original author and source are credited.
